# Supplementary material
Source: publisher figshare collection journal article supplement (https://acs.figshare.com/ndownloader/files/8941783)
Supplement: Supplementary file 1 [file 8941783]

## Supporting Information

### Impact of sodium humate coating on collector surfaces on deposition of polymer-coated nano-iron particles

Vesna Micić<sup>†</sup>, Doris Schmid<sup>†</sup>, Nathan Bossa<sup>‡</sup>, Andreas Gondikas<sup>†, §</sup>, Milica Velimirovic<sup>†</sup>, Frank von der Kammer<sup>†</sup>, Mark R. Wiesner<sup>‡</sup>, Thilo Hofmann<sup>†, \*</sup>

<sup>†</sup> Department of Environmental Geosciences and Environmental Science Research Network, University of Vienna, Althanstrasse 14, 1090 Vienna, Austria

<sup>‡</sup> Department of Civil and Environmental Engineering, Pratt School of Engineering and Center for the Environmental Implications of NanoTechnology (CEINT), Duke University, Durham, North Carolina 27708, United States

<sup>§</sup> Department of Marine Sciences, University of Gothenburg, Guldhedsgatan 5a, 40530 Göteborg, Sweden

\* Corresponding author

#### List of tables

**Table S 1.** Properties of U.S. EPA moderately hard synthetic standard water..... S2

**Table S 2.** Chemical composition of the collectors..... S3

#### List of figures

**Figure S 1.** SEC chromatograms showing molecular weight distributions in < 0.1 µm filtrates of 10 and 100 mg/L Na humate solutions in synthetic water at pH 7.5. .... S2

**Figure S 2.** Scanning electron micrographs of the collectors. .... S3

**Figure S 3.** X-ray diffractograms of the fine collector material, with an insert showing a detail from the diffractogram of the fines in Ottawa sand. .... S4

**Figure S 4.** X-ray diffractograms of the bulk pulverized collector material. .... S4

**Figure S 5.** Duplicate breakthrough curves for 10 mg/L Na humate in acid-washed glass beads (left) and acid-washed Ottawa sand (right)..... S5

**Figure S 6.** Scanning electron micrographs of the collector surfaces, with the arrow indicating the trend towards increasing surface roughness. .... S5

**Figure S 7.** Duplicate breakthrough curves for 10 mg/L Na humate in the collectors from Site 1(left) and Site 2(right). .... S5

**References** ..... S6

**Table S 1.** Properties of U.S. EPA moderately hard synthetic standard water. The anion content was determined by IC (ICS-1000, Dionex), except for the  $\text{HCO}_3^-$  content which was determined by titration with 0.1 N HCl to pH 4.3 (Appelo and Postma, 2004). The cation content was determined by ICP-OES (Optima 5300 DV, PerkinElmer). The pH was measured using a pH meter equipped with a pre-calibrated micro combination electrode (WTW GmbH); EC was measured using a standard conductivity cell (Tetracon®325, WTW GmbH).

| $\text{Ca}^{2+}$ | $\text{Mg}^{2+}$ | $\text{Na}^+$ | $\text{K}^+$ | $\text{Cl}^-$ | $\text{SO}_4^{2-}$ | $\text{NO}_3^-$ | $\text{HCO}_3^-$ | pH  | EC                          | IS                             |
|------------------|------------------|---------------|--------------|---------------|--------------------|-----------------|------------------|-----|-----------------------------|--------------------------------|
| (mM)             | (mM)             | (mM)          | (mM)         | (mM)          | (mM)               | (mM)            | (mM)             | (-) | ( $\mu\text{S}/\text{cm}$ ) | (mM)                           |
| 0.3              | 0.5              | 1.1           | 0.1          | 0.1           | 0.8                | 1.1             | 1.0              | 7.7 | 297                         | $4.8^{\dagger}/4.9^{\ddagger}$ |

$^{\dagger}$  calculated as:  $IS (M) = 1.6 \times 10^{-5} \times EC (\mu\text{S}/\text{cm})$  (McCleskey et al. 2012)

$^{\ddagger}$  calculated as:  $IS (M) = \frac{1}{2} \sum_i z_i^2 c_i (M)$  (Laxen 1977).

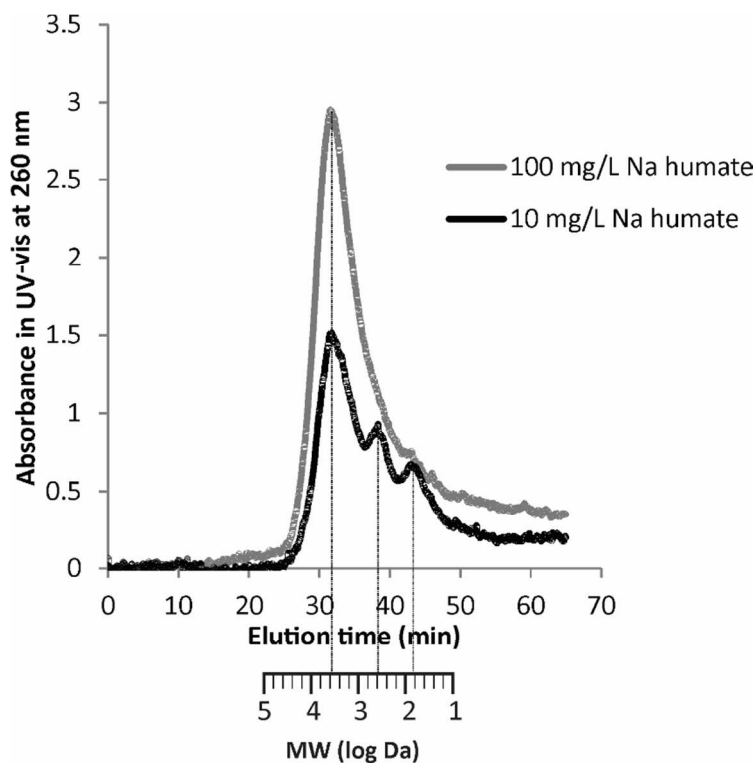

**Figure S 1.** SEC chromatograms showing molecular weight (MW) distributions in  $< 0.1 \mu\text{m}$  filtrates of 10 and 100 mg/L Na humate solutions in synthetic water at pH 7.5; 3.6 log Da  $\approx$  3,980 Da; 2.6 log Da  $\approx$  400 Da; 1.8 log Da  $\approx$  63 Da. The MW scale is based on the retention time of MW standards as described in the Materials and Methods section.

**Table S 2.** TOC content and chemical composition of the collectors.

|                                    | Glass beads* | Ottawa sand† | Dorsilit®8 sand a.w. | Dorsilit®8 sand | Site 1 | Site 2 |
|------------------------------------|--------------|--------------|----------------------|-----------------|--------|--------|
| TOC (%)                            | n.d.         | n.d.         | n.d.                 | n.d.            | n.d.   | 0.042  |
| SiO <sub>2</sub> (%)               | 100          | 99.8         | 98.11                | 98.45           | 48.10  | 69.74  |
| Al <sub>2</sub> O <sub>3</sub> (%) |              | 0.06         | 0.38                 | 0.46            | 3.50   | 10.23  |
| Fe <sub>2</sub> O <sub>3</sub> (%) |              | 0.02         | 0.03                 | 0.18            | 1.59   | 5.95   |
| CaO (%)                            |              | 0.01         | < 0.02               | 0.02            | 20.68  | 2.26   |
| MgO (%)                            |              | 0.01         | 0.04                 | 0.03            | 3.57   | 1.52   |
| Na <sub>2</sub> O (%)              |              | 0.01         | 0.02                 | 0.03            | 0.70   | 1.85   |
| K <sub>2</sub> O (%)               |              | 0.01         | 0.13                 | 0.10            | 0.76   | 3.45   |
| MnO (%)                            |              | n.d.         | < 0.002              | < 0.002         | 0.04   | 0.11   |
| TiO <sub>2</sub> (%)               |              | 0.01         | 0.04                 | 0.08            | 0.14   | 0.73   |
| P <sub>2</sub> O <sub>5</sub> (%)  |              | n.d.         | 0.01                 | 0.01            | 0.06   | 0.16   |
| L.O.I. (%)                         |              | n.a.         | 0.18                 | 0.23            | 19.71  | 2.72   |

\* manufacturer's specification; † from Ojuri and Fijabi (2012); n.d. = not detected, < 0.005%; L.O.I. = loss on ignition; n.a. = not available; a.w. = acid-washed. L.O.I. was determined after drying 2 g of sample for one hour at 105°C, followed by the "ignition" of samples at 1,000°C and cooling down in an exsiccator.

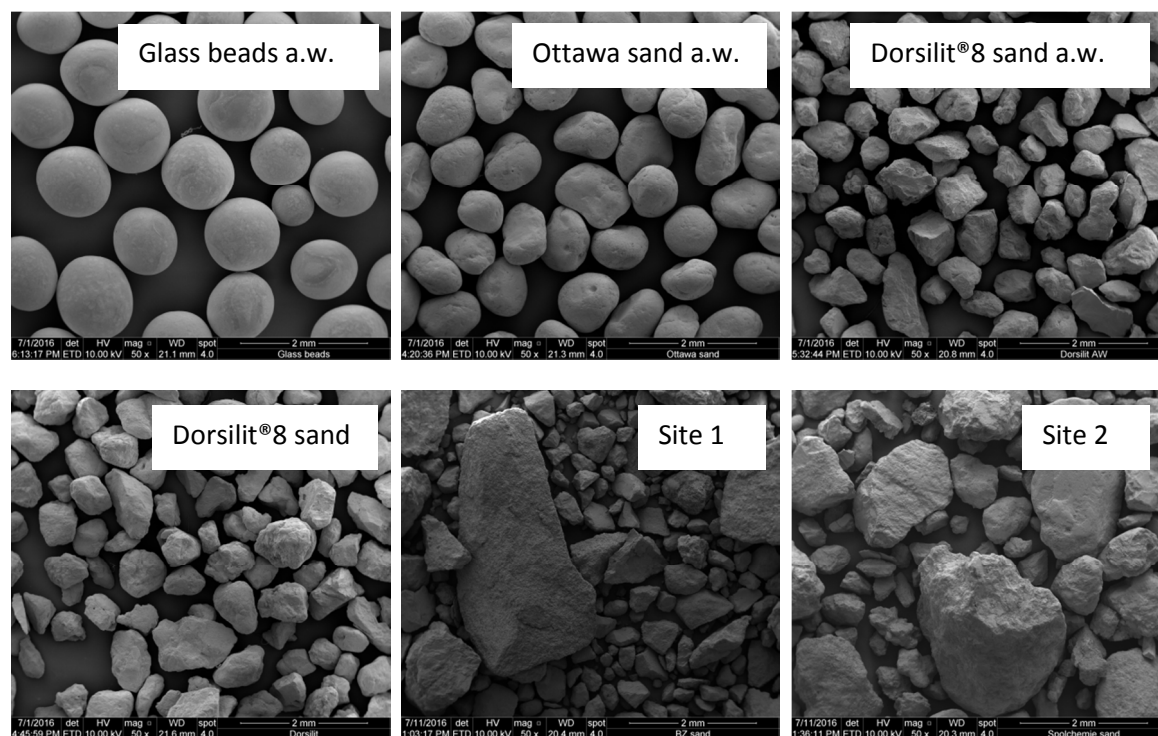

**Figure S 2.** Scanning electron micrographs of the collectors. Magnification 50 x; a.w. = acid-washed.

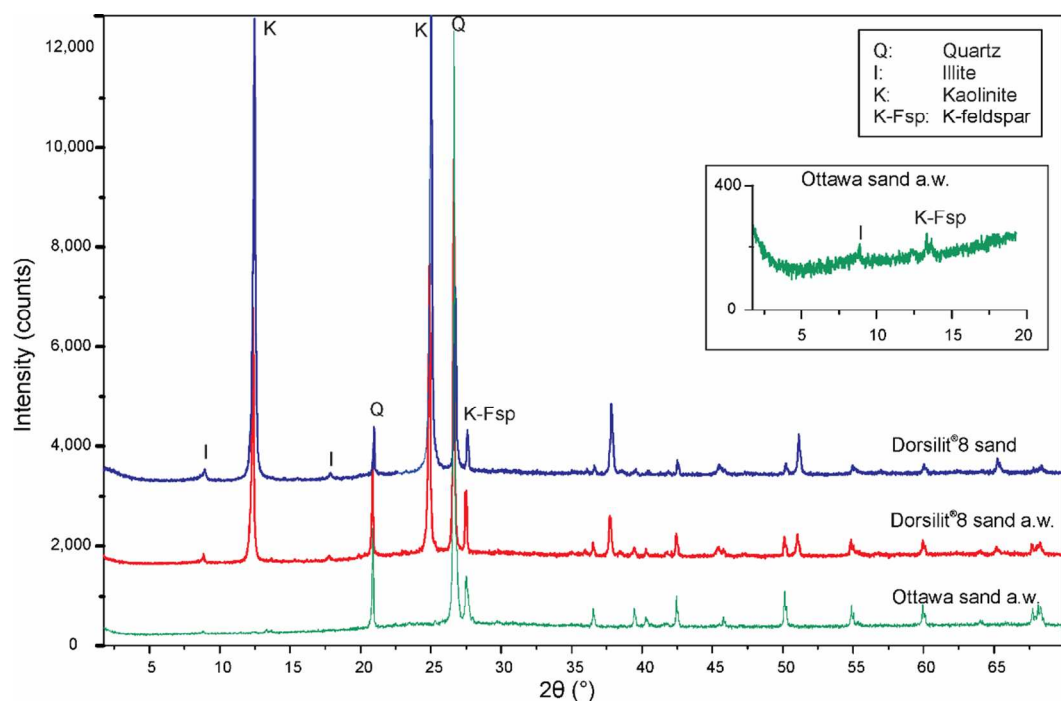

**Figure S 3.** X-ray diffractograms of the fine collector material, with an insert showing a detail from the diffractogram of the fines in Ottawa sand (a.w. = acid-washed). The fine fraction was isolated from the bulk suspension in deionized water by directly collecting the supernatant after 6 minutes of ultrasonication in a Branson Ultrasonics Sonifier™ 450 (400 W indicated power).

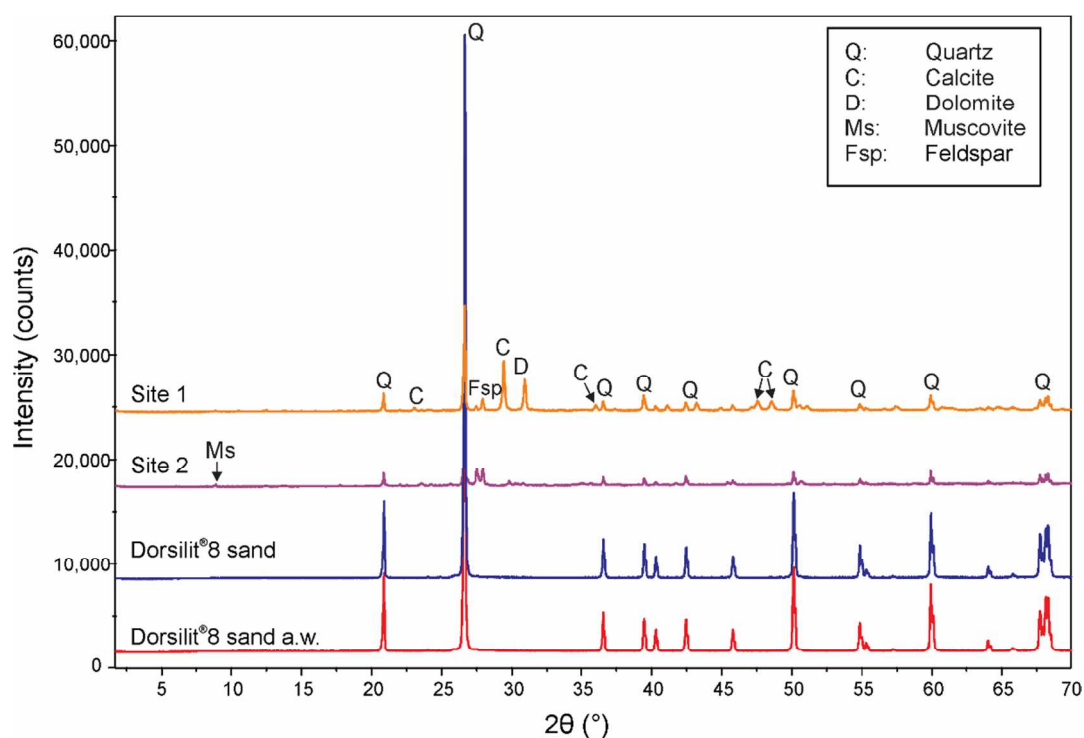

**Figure S 4.** X-ray diffractograms of the bulk pulverized collector material (a.w. = acid-washed).

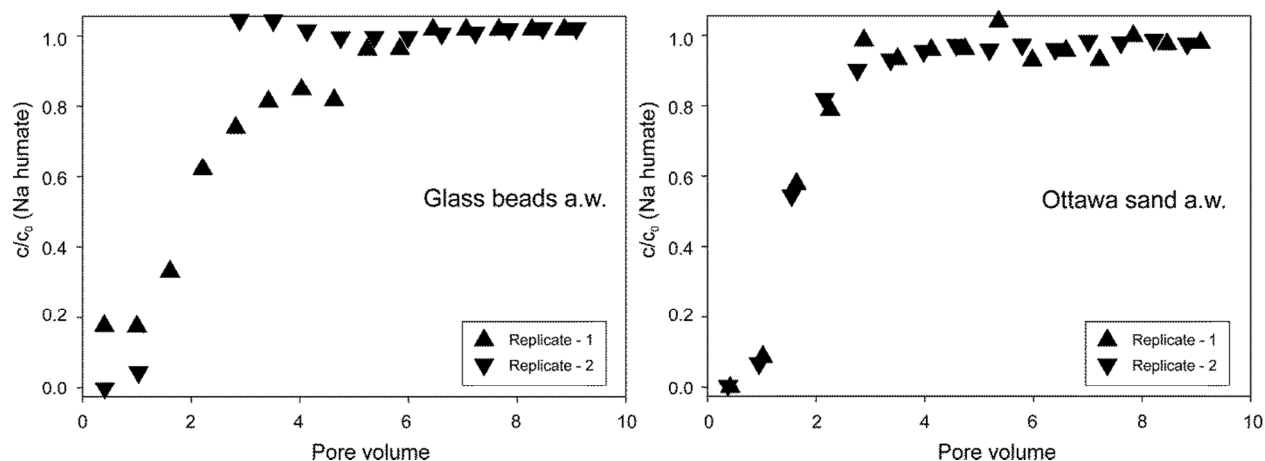

**Figure S 5.** Duplicate breakthrough curves for 10 mg/L Na humate in acid-washed glass beads (left) and acid-washed Ottawa sand (right); a.w. = acid-washed.

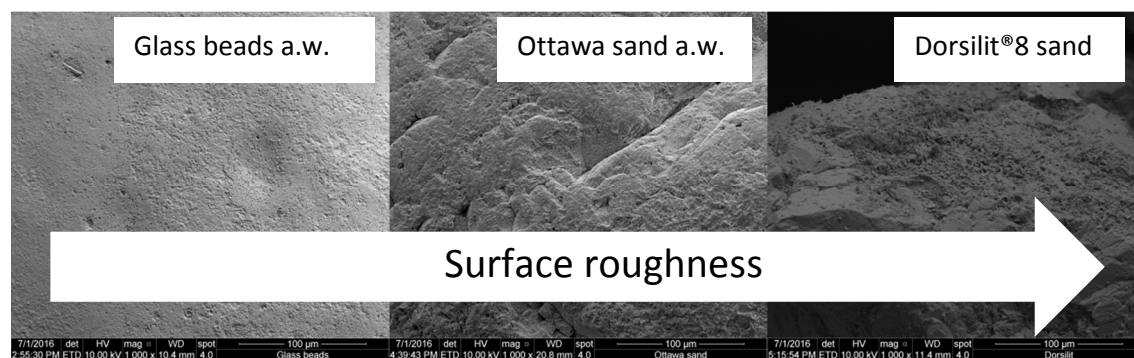

**Figure S 6.** Scanning electron micrographs of the collector surfaces, with the arrow indicating the trend towards increasing surface roughness. Magnification 1,000 x; a.w. = acid-washed.

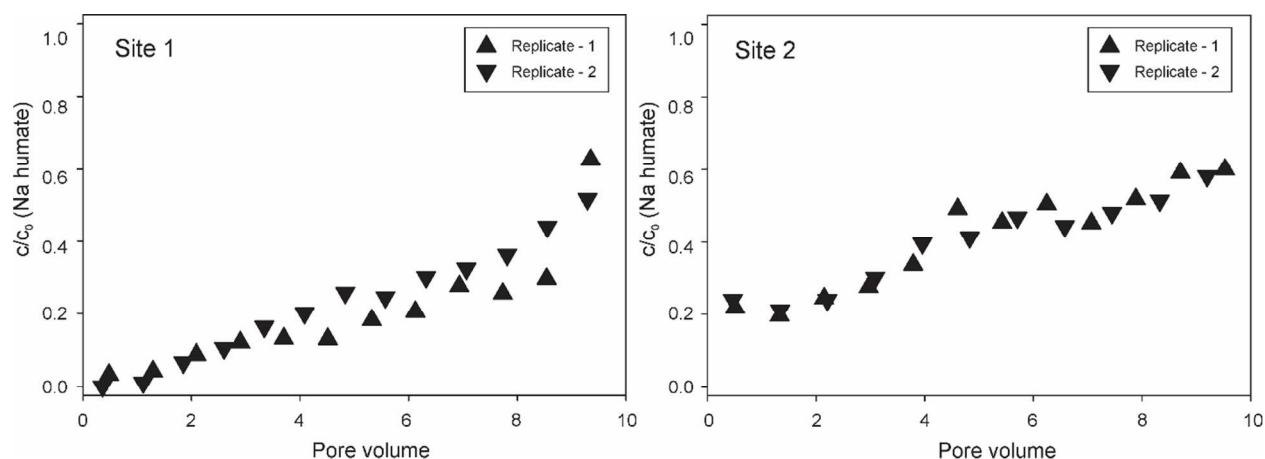

**Figure S 7.** Duplicate breakthrough curves for 10 mg/L Na humate in the collectors from Site 1(left) and Site 2(right).

## References

Appelo, C.A.J. and Postma, D. (2004) *Geochemistry, Groundwater and Pollution*, CRC Press , Boca Raton, FL, USA

Laxen, D.P.H. (1977) Specific Conductance Method for Quality-Control in Water Analysis. *Water Research* 11(1), 91-94.

McCleskey, R.B., Nordstrom, D.K. and Ryan, J.N. (2012) Comparison of electrical conductivity calculation methods for natural waters. *Limnology and Oceanography-Methods* 10, 952-967.

Ojuri O.O. and Fijabi D.O. (2012) Standard sand for geotechnical engineering and geoenvironmental research in Nigeria: Igbokoda sand. *Advances in Environmental Research*, 1 (4), 305-321.
